# Supplementary material for: Host Control of Symbiont Natural Product Chemistry in Cryptic Populations of the Tunicate Lissoclinum patella
Source: PLoS One. 2014 May 2;9(5):e95850. doi: 10.1371/journal.pone.0095850 (PMC4008419; doi:10.1371/journal.pone.0095850)
Supplement: Table S2 — Nucleotide identities of D. molle and D. vexillum COXI genes used to construct the trees in Figures 3 and 4. Found at DOI: xxxxxxx (48K XLSX). (XLSX) [file pone.0095850.s002.xlsx]

## Sheet: D. molle
	Didemnum_molle_AB499971.1 (White)	Didemnum_molle_AB433959.1 (White)	Didemnum_molle_AB433957.1 (White)	Didemnum_molle_AB433961.1 (White)	Didemnum_molle_AB433962.1 (White)	Didemnum_molle_AB433960.1 (White)	Didemnum_molle_AB433956.1 (White)	Didemnum_molle_AB433955.1 (White)	Didemnum_molle_AB433958.1 (White)	Didemnum_molle_AB433963.1 (White)	Didemnum_molle_AB433954.1 (White)	Didemnum_molle_AB557715.1 (Large)	Didemnum_molle_AB557714.1 (Large)	Didemnum_molle_AB433964.1 (Large)	Didemnum_molle_AB433971.1 (Large)	Didemnum_molle_AB433970.1 (Large)	Didemnum_molle_AB433967.1 (Large)	Didemnum_molle_AB433968.1 (Large)	Didemnum_molle_AB433966.1 (Large)	Didemnum_molle_AB433969.1 (Large)	Didemnum_molle_AB433965.1 (Large)	Didemnum_molle_AB557717.1 (Small)	Didemnum_molle_AB557716.1 (Small)	Didemnum_molle_AB499970.1 (Large)	Didemnum_molle_AB433943.1 (Gray)	Didemnum_molle_AB557712.1 (Gray)	Didemnum_molle_AB433946.1 (Gray)	Didemnum_molle_AB433945.1 (Gray)	Didemnum_molle_AB433944.1 (Gray)	Didemnum_molle_AB433948.1 (Brown)	Didemnum_molle_AB557713.1 (Brown)	Didemnum_molle_AB433947.1 (Brown)	Didemnum_molle_AB433952.1 (Brown)	Didemnum_molle_AB433951.1 (Brown)	Didemnum_molle_AB433949.1 (Brown)	Didemnum_molle_AB433950.1 (Brown)	Didemnum_molle_AB433953.1 (Brown)
Didemnum_molle_AB499971.1 (White)	100	100	98.7	99	99	99	100	100	98.7	99	99.7	91.7	93.2	92.9	93.4	92.9	92.9	93.4	93.9	93.4	92.9	93.2	92.7	90.2	90.2	90.9	90.4	90.4	90.4	89.4	89.1	89.4	89.4	89.4	89.4	89.4	89.4
Didemnum_molle_AB433959.1 (White)	100	100	98.7	99	99	99	100	100	98.7	99	99.7	91.7	93.2	92.9	93.4	92.9	92.9	93.4	93.9	93.4	92.9	93.2	92.7	90.2	90.2	90.9	90.4	90.4	90.4	89.4	89.1	89.4	89.4	89.4	89.4	89.4	89.4
Didemnum_molle_AB433957.1 (White)	98.7	98.7	100	99.7	99.7	99.7	98.7	98.7	100	99.7	98.5	92.2	93.4	93.2	93.7	93.2	93.2	93.7	94.2	93.7	93.2	92.9	92.4	89.9	89.9	90.7	90.2	90.2	90.2	89.1	88.9	89.1	89.1	89.1	89.1	89.1	89.1
Didemnum_molle_AB433961.1 (White)	99	99	99.7	100	100	100	99	99	99.7	100	98.7	91.9	93.2	92.9	93.4	92.9	92.9	93.4	93.9	93.4	92.9	92.7	92.2	89.6	89.6	90.4	89.9	89.9	89.9	88.9	88.6	88.9	88.9	88.9	88.9	88.9	88.9
Didemnum_molle_AB433962.1 (White)	99	99	99.7	100	100	100	99	99	99.7	100	98.7	91.9	93.2	92.9	93.4	92.9	92.9	93.4	93.9	93.4	92.9	92.7	92.2	89.6	89.6	90.4	89.9	89.9	89.9	88.9	88.6	88.9	88.9	88.9	88.9	88.9	88.9
Didemnum_molle_AB433960.1 (White)	99	99	99.7	100	100	100	99	99	99.7	100	98.7	91.9	93.2	92.9	93.4	92.9	92.9	93.4	93.9	93.4	92.9	92.7	92.2	89.6	89.6	90.4	89.9	89.9	89.9	88.9	88.6	88.9	88.9	88.9	88.9	88.9	88.9
Didemnum_molle_AB433956.1 (White)	100	100	98.7	99	99	99	100	100	98.7	99	99.7	91.7	93.2	92.9	93.4	92.9	92.9	93.4	93.9	93.4	92.9	93.2	92.7	90.2	90.2	90.9	90.4	90.4	90.4	89.4	89.1	89.4	89.4	89.4	89.4	89.4	89.4
Didemnum_molle_AB433955.1 (White)	100	100	98.7	99	99	99	100	100	98.7	99	99.7	91.7	93.2	92.9	93.4	92.9	92.9	93.4	93.9	93.4	92.9	93.2	92.7	90.2	90.2	90.9	90.4	90.4	90.4	89.4	89.1	89.4	89.4	89.4	89.4	89.4	89.4
Didemnum_molle_AB433958.1 (White)	98.7	98.7	100	99.7	99.7	99.7	98.7	98.7	100	99.7	98.5	92.2	93.4	93.2	93.7	93.2	93.2	93.7	94.2	93.7	93.2	92.9	92.4	89.9	89.9	90.7	90.2	90.2	90.2	89.1	88.9	89.1	89.1	89.1	89.1	89.1	89.1
Didemnum_molle_AB433963.1 (White)	99	99	99.7	100	100	100	99	99	99.7	100	98.7	91.9	93.2	92.9	93.4	92.9	92.9	93.4	93.9	93.4	92.9	92.7	92.2	89.6	89.6	90.4	89.9	89.9	89.9	88.9	88.6	88.9	88.9	88.9	88.9	88.9	88.9
Didemnum_molle_AB433954.1 (White)	99.7	99.7	98.5	98.7	98.7	98.7	99.7	99.7	98.5	98.7	100	91.4	92.9	92.7	93.2	92.7	92.7	93.2	93.7	93.2	92.7	92.9	92.4	89.9	89.9	90.7	90.2	90.2	90.2	89.1	88.9	89.1	89.1	89.1	89.1	89.1	89.1
Didemnum_molle_AB557715.1 (Large)	91.7	91.7	92.2	91.9	91.9	91.9	91.7	91.7	92.2	91.9	91.4	100	98.2	97.5	98	97.5	97.5	98	97	98	97.5	93.4	93.7	88.1	88.1	88.9	88.4	88.4	88.4	87.9	87.9	87.9	87.9	87.9	87.9	87.9	87.9
Didemnum_molle_AB557714.1 (Large)	93.2	93.2	93.4	93.2	93.2	93.2	93.2	93.2	93.4	93.2	92.9	98.2	100	99.2	99.7	99.2	99.2	99.7	98.7	99.7	99.2	94.7	94.9	89.9	89.9	90.7	90.2	90.2	90.2	89.6	89.4	89.6	89.6	89.6	89.6	89.6	89.6
Didemnum_molle_AB433964.1 (Large)	92.9	92.9	93.2	92.9	92.9	92.9	92.9	92.9	93.2	92.9	92.7	97.5	99.2	100	99.5	100	100	99.5	98.5	99.5	100	94.4	94.2	89.1	89.1	89.9	89.4	89.4	89.4	88.9	88.6	88.9	88.9	88.9	88.9	88.9	88.9
Didemnum_molle_AB433971.1 (Large)	93.4	93.4	93.7	93.4	93.4	93.4	93.4	93.4	93.7	93.4	93.2	98	99.7	99.5	100	99.5	99.5	100	99	100	99.5	94.9	94.7	89.6	89.6	90.4	89.9	89.9	89.9	89.4	89.1	89.4	89.4	89.4	89.4	89.4	89.4
Didemnum_molle_AB433970.1 (Large)	92.9	92.9	93.2	92.9	92.9	92.9	92.9	92.9	93.2	92.9	92.7	97.5	99.2	100	99.5	100	100	99.5	98.5	99.5	100	94.4	94.2	89.1	89.1	89.9	89.4	89.4	89.4	88.9	88.6	88.9	88.9	88.9	88.9	88.9	88.9
Didemnum_molle_AB433967.1 (Large)	92.9	92.9	93.2	92.9	92.9	92.9	92.9	92.9	93.2	92.9	92.7	97.5	99.2	100	99.5	100	100	99.5	98.5	99.5	100	94.4	94.2	89.1	89.1	89.9	89.4	89.4	89.4	88.9	88.6	88.9	88.9	88.9	88.9	88.9	88.9
Didemnum_molle_AB433968.1 (Large)	93.4	93.4	93.7	93.4	93.4	93.4	93.4	93.4	93.7	93.4	93.2	98	99.7	99.5	100	99.5	99.5	100	99	100	99.5	94.9	94.7	89.6	89.6	90.4	89.9	89.9	89.9	89.4	89.1	89.4	89.4	89.4	89.4	89.4	89.4
Didemnum_molle_AB433966.1 (Large)	93.9	93.9	94.2	93.9	93.9	93.9	93.9	93.9	94.2	93.9	93.7	97	98.7	98.5	99	98.5	98.5	99	100	99	98.5	94.4	94.2	89.6	89.6	90.4	89.9	89.9	89.9	89.4	89.1	89.4	89.4	89.4	89.4	89.4	89.4
Didemnum_molle_AB433969.1 (Large)	93.4	93.4	93.7	93.4	93.4	93.4	93.4	93.4	93.7	93.4	93.2	98	99.7	99.5	100	99.5	99.5	100	99	100	99.5	94.9	94.7	89.6	89.6	90.4	89.9	89.9	89.9	89.4	89.1	89.4	89.4	89.4	89.4	89.4	89.4
Didemnum_molle_AB433965.1 (Large)	92.9	92.9	93.2	92.9	92.9	92.9	92.9	92.9	93.2	92.9	92.7	97.5	99.2	100	99.5	100	100	99.5	98.5	99.5	100	94.4	94.2	89.1	89.1	89.9	89.4	89.4	89.4	88.9	88.6	88.9	88.9	88.9	88.9	88.9	88.9
Didemnum_molle_AB557717.1 (Small)	93.2	93.2	92.9	92.7	92.7	92.7	93.2	93.2	92.9	92.7	92.9	93.4	94.7	94.4	94.9	94.4	94.4	94.9	94.4	94.9	94.4	100	98	89.9	89.9	90.7	90.2	90.2	90.2	89.1	88.9	89.1	89.1	89.1	89.1	89.1	89.1
Didemnum_molle_AB557716.1 (Small)	92.7	92.7	92.4	92.2	92.2	92.2	92.7	92.7	92.4	92.2	92.4	93.7	94.9	94.2	94.7	94.2	94.2	94.7	94.2	94.7	94.2	98	100	89.9	89.9	90.7	90.2	90.2	90.2	89.1	88.9	89.1	89.1	89.1	89.1	89.1	89.1
Didemnum_molle_AB499970.1 (Large)	90.2	90.2	89.9	89.6	89.6	89.6	90.2	90.2	89.9	89.6	89.9	88.1	89.9	89.1	89.6	89.1	89.1	89.6	89.6	89.6	89.1	89.9	89.9	100	99.5	98.7	99.7	99.7	99.7	96.2	96	96.2	96.2	96.2	96.2	96.2	96.2
Didemnum_molle_AB433943.1 (Gray)	90.2	90.2	89.9	89.6	89.6	89.6	90.2	90.2	89.9	89.6	89.9	88.1	89.9	89.1	89.6	89.1	89.1	89.6	89.6	89.6	89.1	89.9	89.9	99.5	100	98.7	99.7	99.7	99.7	96.2	96	96.2	96.2	96.2	96.2	96.2	96.2
Didemnum_molle_AB557712.1 (Gray)	90.9	90.9	90.7	90.4	90.4	90.4	90.9	90.9	90.7	90.4	90.7	88.9	90.7	89.9	90.4	89.9	89.9	90.4	90.4	90.4	89.9	90.7	90.7	98.7	98.7	100	99	99	99	96.5	96.2	96.5	96.5	96.5	96.5	96.5	96.5
Didemnum_molle_AB433946.1 (Gray)	90.4	90.4	90.2	89.9	89.9	89.9	90.4	90.4	90.2	89.9	90.2	88.4	90.2	89.4	89.9	89.4	89.4	89.9	89.9	89.9	89.4	90.2	90.2	99.7	99.7	99	100	100	100	96.5	96.2	96.5	96.5	96.5	96.5	96.5	96.5
Didemnum_molle_AB433945.1 (Gray)	90.4	90.4	90.2	89.9	89.9	89.9	90.4	90.4	90.2	89.9	90.2	88.4	90.2	89.4	89.9	89.4	89.4	89.9	89.9	89.9	89.4	90.2	90.2	99.7	99.7	99	100	100	100	96.5	96.2	96.5	96.5	96.5	96.5	96.5	96.5
Didemnum_molle_AB433944.1 (Gray)	90.4	90.4	90.2	89.9	89.9	89.9	90.4	90.4	90.2	89.9	90.2	88.4	90.2	89.4	89.9	89.4	89.4	89.9	89.9	89.9	89.4	90.2	90.2	99.7	99.7	99	100	100	100	96.5	96.2	96.5	96.5	96.5	96.5	96.5	96.5
Didemnum_molle_AB433948.1 (Brown)	89.4	89.4	89.1	88.9	88.9	88.9	89.4	89.4	89.1	88.9	89.1	87.9	89.6	88.9	89.4	88.9	88.9	89.4	89.4	89.4	88.9	89.1	89.1	96.2	96.2	96.5	96.5	96.5	96.5	100	99.7	100	100	100	100	100	100
Didemnum_molle_AB557713.1 (Brown)	89.1	89.1	88.9	88.6	88.6	88.6	89.1	89.1	88.9	88.6	88.9	87.9	89.4	88.6	89.1	88.6	88.6	89.1	89.1	89.1	88.6	88.9	88.9	96	96	96.2	96.2	96.2	96.2	99.7	100	99.7	99.7	99.7	99.7	99.7	99.7
Didemnum_molle_AB433947.1 (Brown)	89.4	89.4	89.1	88.9	88.9	88.9	89.4	89.4	89.1	88.9	89.1	87.9	89.6	88.9	89.4	88.9	88.9	89.4	89.4	89.4	88.9	89.1	89.1	96.2	96.2	96.5	96.5	96.5	96.5	100	99.7	100	100	100	100	100	100
Didemnum_molle_AB433952.1 (Brown)	89.4	89.4	89.1	88.9	88.9	88.9	89.4	89.4	89.1	88.9	89.1	87.9	89.6	88.9	89.4	88.9	88.9	89.4	89.4	89.4	88.9	89.1	89.1	96.2	96.2	96.5	96.5	96.5	96.5	100	99.7	100	100	100	100	100	100
Didemnum_molle_AB433951.1 (Brown)	89.4	89.4	89.1	88.9	88.9	88.9	89.4	89.4	89.1	88.9	89.1	87.9	89.6	88.9	89.4	88.9	88.9	89.4	89.4	89.4	88.9	89.1	89.1	96.2	96.2	96.5	96.5	96.5	96.5	100	99.7	100	100	100	100	100	100
Didemnum_molle_AB433949.1 (Brown)	89.4	89.4	89.1	88.9	88.9	88.9	89.4	89.4	89.1	88.9	89.1	87.9	89.6	88.9	89.4	88.9	88.9	89.4	89.4	89.4	88.9	89.1	89.1	96.2	96.2	96.5	96.5	96.5	96.5	100	99.7	100	100	100	100	100	100
Didemnum_molle_AB433950.1 (Brown)	89.4	89.4	89.1	88.9	88.9	88.9	89.4	89.4	89.1	88.9	89.1	87.9	89.6	88.9	89.4	88.9	88.9	89.4	89.4	89.4	88.9	89.1	89.1	96.2	96.2	96.5	96.5	96.5	96.5	100	99.7	100	100	100	100	100	100
Didemnum_molle_AB433953.1 (Brown)	89.4	89.4	89.1	88.9	88.9	88.9	89.4	89.4	89.1	88.9	89.1	87.9	89.6	88.9	89.4	88.9	88.9	89.4	89.4	89.4	88.9	89.1	89.1	96.2	96.2	96.5	96.5	96.5	96.5	100	99.7	100	100	100	100	100	100

## Sheet: D. vexillum
	Didemnum_vexillum_EU419413.2	Didemnum_vexillum_JQ663509.1	Didemnum_vexillum_EU419426.1	Didemnum_vexillum_EU419412.2	Didemnum_vexillum_JF738057.1 (H2 Clade A)	Didemnum_vexillum_EU419457.1	Didemnum_vexillum_EU419436.1	Didemnum_vexillum_EU419427.1	Didemnum_vexillum_EU419421.1	Didemnum_vexillum_EU419453.1	Didemnum_vexillum_EU419449.1	Didemnum_vexillum_EU419423.1	Didemnum_vexillum_EU419411.1	Didemnum_vexillum_EU419439.1	Didemnum_vexillum_EU742676.1	Didemnum_vexillum_JQ663508.1	Didemnum_vexillum_EU419441.1	Didemnum_vexillum_EU742665.2	Didemnum_vexillum_EU419417.1	Didemnum_vexillum_EU419445.1	Didemnum_vexillum_EU419425.1	Didemnum_vexillum_EU742663.2	Didemnum_vexillum_EU419447.1	Didemnum_vexillum_EU419452.1	Didemnum_vexillum_EU419401.1	Didemnum_vexillum_EU742674.1	Didemnum_vexillum_EU419402.1	Didemnum_vexillum_JF738059.1 (H5 Clade A)	Didemnum_vexillum_EU419431.1	Didemnum_vexillum_EU742666.1	Didemnum_vexillum_EU742667.1	Didemnum_vexillum_EU419433.2	Didemnum_vexillum_EU419450.1	Didemnum_vexillum_EU419454.1	Didemnum_vexillum_EU419442.1	Didemnum_vexillum_EU419418.1	Didemnum_vexillum_EU419451.1	Didemnum_vexillum_EU419435.1	Didemnum_vexillum_EU419419.1	Didemnum_vexillum_EU742664.1 (H4 Clade A)	Didemnum_vexillum_EU419448.2	Didemnum_vexillum_EU419434.1	Didemnum_vexillum_EU419403.1	Didemnum_vexillum_EU419437.2	Didemnum_vexillum_EU742662.1	Didemnum_vexillum_EU419415.1	Didemnum_vexillum_EU419410.1	Didemnum_vexillum_EU419404.2	Didemnum_vexillum_EU742677.1
Didemnum_vexillum_EU419413.2	100	100	100	100	100	100	100	100	98.5	98.5	98.5	98.5	98.5	98.5	98.5	98.5	98.5	98.5	98.5	98.5	98.5	98.5	98.5	98.5	98.5	98.5	98.5	98.5	98.5	98.5	98.5	98.5	98.5	98.5	98.5	98.5	98.5	98.5	98.5	98.5	98.5	98.5	98.5	98.5	98.5	98.5	98.5	98.5	98.5
Didemnum_vexillum_JQ663509.1	100	100	100	100	100	100	100	100	98.5	98.5	98.5	98.5	98.5	98.5	98.5	98.5	98.5	98.5	98.5	98.5	98.5	98.5	98.5	98.5	98.5	98.5	98.5	98.5	98.5	98.5	98.5	98.5	98.5	98.5	98.5	98.5	98.5	98.5	98.5	98.5	98.5	98.5	98.5	98.5	98.5	98.5	98.5	98.5	98.5
Didemnum_vexillum_EU419426.1	100	100	100	100	100	100	100	100	98.5	98.5	98.5	98.5	98.5	98.5	98.5	98.5	98.5	98.5	98.5	98.5	98.5	98.5	98.5	98.5	98.5	98.5	98.5	98.5	98.5	98.5	98.5	98.5	98.5	98.5	98.5	98.5	98.5	98.5	98.5	98.5	98.5	98.5	98.5	98.5	98.5	98.5	98.5	98.5	98.5
Didemnum_vexillum_EU419412.2	100	100	100	100	100	100	100	100	98.5	98.5	98.5	98.5	98.5	98.5	98.5	98.5	98.5	98.5	98.5	98.5	98.5	98.5	98.5	98.5	98.5	98.5	98.5	98.5	98.5	98.5	98.5	98.5	98.5	98.5	98.5	98.5	98.5	98.5	98.5	98.5	98.5	98.5	98.5	98.5	98.5	98.5	98.5	98.5	98.5
Didemnum_vexillum_JF738057.1 (H2 Clade A)	100	100	100	100	100	100	100	100	98.5	98.5	98.5	98.5	98.5	98.5	98.5	98.5	98.5	98.5	98.5	98.5	98.5	98.5	98.5	98.5	98.5	98.5	98.5	98.5	98.5	98.5	98.5	98.5	98.5	98.5	98.5	98.5	98.5	98.5	98.5	98.5	98.5	98.5	98.5	98.5	98.5	98.5	98.5	98.5	98.5
Didemnum_vexillum_EU419457.1	100	100	100	100	100	100	100	100	98.5	98.5	98.5	98.5	98.5	98.5	98.5	98.5	98.5	98.5	98.5	98.5	98.5	98.5	98.5	98.5	98.5	98.5	98.5	98.5	98.5	98.5	98.5	98.5	98.5	98.5	98.5	98.5	98.5	98.5	98.5	98.5	98.5	98.5	98.5	98.5	98.5	98.5	98.5	98.5	98.5
Didemnum_vexillum_EU419436.1	100	100	100	100	100	100	100	100	98.5	98.5	98.5	98.5	98.5	98.5	98.5	98.5	98.5	98.5	98.5	98.5	98.5	98.5	98.5	98.5	98.5	98.5	98.5	98.5	98.5	98.5	98.5	98.5	98.5	98.5	98.5	98.5	98.5	98.5	98.5	98.5	98.5	98.5	98.5	98.5	98.5	98.5	98.5	98.5	98.5
Didemnum_vexillum_EU419427.1	100	100	100	100	100	100	100	100	98.5	98.5	98.5	98.5	98.5	98.5	98.5	98.5	98.5	98.5	98.5	98.5	98.5	98.5	98.5	98.5	98.5	98.5	98.5	98.5	98.5	98.5	98.5	98.5	98.5	98.5	98.5	98.5	98.5	98.5	98.5	98.5	98.5	98.5	98.5	98.5	98.5	98.5	98.5	98.5	98.5
Didemnum_vexillum_EU419421.1	98.5	98.5	98.5	98.5	98.5	98.5	98.5	98.5	100	100	100	99.7	100	100	100	99.7	99.7	99.7	100	100	100	100	100	100	100	100	100	99.7	100	99.7	100	100	99.7	100	100	100	100	99.7	100	99.7	100	99.7	100	100	100	100	100	100	100
Didemnum_vexillum_EU419453.1	98.5	98.5	98.5	98.5	98.5	98.5	98.5	98.5	100	100	100	99.7	100	100	100	99.7	99.7	99.7	100	100	100	100	100	100	100	100	100	99.7	100	99.7	100	100	99.7	100	100	100	100	99.7	100	99.7	100	99.7	100	100	100	100	100	100	100
Didemnum_vexillum_EU419449.1	98.5	98.5	98.5	98.5	98.5	98.5	98.5	98.5	100	100	100	99.7	100	100	100	99.7	99.7	99.7	100	100	100	100	100	100	100	100	100	99.7	100	99.7	100	100	99.7	100	100	100	100	99.7	100	99.7	100	99.7	100	100	100	100	100	100	100
Didemnum_vexillum_EU419423.1	98.5	98.5	98.5	98.5	98.5	98.5	98.5	98.5	99.7	99.7	99.7	100	99.7	99.7	99.7	100	100	100	99.7	99.7	99.7	99.7	99.7	99.7	99.7	99.7	99.7	100	99.7	100	99.7	99.7	100	99.7	99.7	99.7	99.7	100	99.7	100	99.7	100	99.7	99.7	99.7	99.7	99.7	99.7	99.7
Didemnum_vexillum_EU419411.1	98.5	98.5	98.5	98.5	98.5	98.5	98.5	98.5	100	100	100	99.7	100	100	100	99.7	99.7	99.7	100	100	100	100	100	100	100	100	100	99.7	100	99.7	100	100	99.7	100	100	100	100	99.7	100	99.7	100	99.7	100	100	100	100	100	100	100
Didemnum_vexillum_EU419439.1	98.5	98.5	98.5	98.5	98.5	98.5	98.5	98.5	100	100	100	99.7	100	100	100	99.7	99.7	99.7	100	100	100	100	100	100	100	100	100	99.7	100	99.7	100	100	99.7	100	100	100	100	99.7	100	99.7	100	99.7	100	100	100	100	100	100	100
Didemnum_vexillum_EU742676.1	98.5	98.5	98.5	98.5	98.5	98.5	98.5	98.5	100	100	100	99.7	100	100	100	99.7	99.7	99.7	100	100	100	100	100	100	100	100	100	99.7	100	99.7	100	100	99.7	100	100	100	100	99.7	100	99.7	100	99.7	100	100	100	100	100	100	100
Didemnum_vexillum_JQ663508.1	98.5	98.5	98.5	98.5	98.5	98.5	98.5	98.5	99.7	99.7	99.7	100	99.7	99.7	99.7	100	100	100	99.7	99.7	99.7	99.7	99.7	99.7	99.7	99.7	99.7	100	99.7	100	99.7	99.7	100	99.7	99.7	99.7	99.7	100	99.7	100	99.7	100	99.7	99.7	99.7	99.7	99.7	99.7	99.7
Didemnum_vexillum_EU419441.1	98.5	98.5	98.5	98.5	98.5	98.5	98.5	98.5	99.7	99.7	99.7	100	99.7	99.7	99.7	100	100	100	99.7	99.7	99.7	99.7	99.7	99.7	99.7	99.7	99.7	100	99.7	100	99.7	99.7	100	99.7	99.7	99.7	99.7	100	99.7	100	99.7	100	99.7	99.7	99.7	99.7	99.7	99.7	99.7
Didemnum_vexillum_EU742665.2	98.5	98.5	98.5	98.5	98.5	98.5	98.5	98.5	99.7	99.7	99.7	100	99.7	99.7	99.7	100	100	100	99.7	99.7	99.7	99.7	99.7	99.7	99.7	99.7	99.7	100	99.7	100	99.7	99.7	100	99.7	99.7	99.7	99.7	100	99.7	100	99.7	100	99.7	99.7	99.7	99.7	99.7	99.7	99.7
Didemnum_vexillum_EU419417.1	98.5	98.5	98.5	98.5	98.5	98.5	98.5	98.5	100	100	100	99.7	100	100	100	99.7	99.7	99.7	100	100	100	100	100	100	100	100	100	99.7	100	99.7	100	100	99.7	100	100	100	100	99.7	100	99.7	100	99.7	100	100	100	100	100	100	100
Didemnum_vexillum_EU419445.1	98.5	98.5	98.5	98.5	98.5	98.5	98.5	98.5	100	100	100	99.7	100	100	100	99.7	99.7	99.7	100	100	100	100	100	100	100	100	100	99.7	100	99.7	100	100	99.7	100	100	100	100	99.7	100	99.7	100	99.7	100	100	100	100	100	100	100
Didemnum_vexillum_EU419425.1	98.5	98.5	98.5	98.5	98.5	98.5	98.5	98.5	100	100	100	99.7	100	100	100	99.7	99.7	99.7	100	100	100	100	100	100	100	100	100	99.7	100	99.7	100	100	99.7	100	100	100	100	99.7	100	99.7	100	99.7	100	100	100	100	100	100	100
Didemnum_vexillum_EU742663.2	98.5	98.5	98.5	98.5	98.5	98.5	98.5	98.5	100	100	100	99.7	100	100	100	99.7	99.7	99.7	100	100	100	100	100	100	100	100	100	99.7	100	99.7	100	100	99.7	100	100	100	100	99.7	100	99.7	100	99.7	100	100	100	100	100	100	100
Didemnum_vexillum_EU419447.1	98.5	98.5	98.5	98.5	98.5	98.5	98.5	98.5	100	100	100	99.7	100	100	100	99.7	99.7	99.7	100	100	100	100	100	100	100	100	100	99.7	100	99.7	100	100	99.7	100	100	100	100	99.7	100	99.7	100	99.7	100	100	100	100	100	100	100
Didemnum_vexillum_EU419452.1	98.5	98.5	98.5	98.5	98.5	98.5	98.5	98.5	100	100	100	99.7	100	100	100	99.7	99.7	99.7	100	100	100	100	100	100	100	100	100	99.7	100	99.7	100	100	99.7	100	100	100	100	99.7	100	99.7	100	99.7	100	100	100	100	100	100	100
Didemnum_vexillum_EU419401.1	98.5	98.5	98.5	98.5	98.5	98.5	98.5	98.5	100	100	100	99.7	100	100	100	99.7	99.7	99.7	100	100	100	100	100	100	100	100	100	99.7	100	99.7	100	100	99.7	100	100	100	100	99.7	100	99.7	100	99.7	100	100	100	100	100	100	100
Didemnum_vexillum_EU742674.1	98.5	98.5	98.5	98.5	98.5	98.5	98.5	98.5	100	100	100	99.7	100	100	100	99.7	99.7	99.7	100	100	100	100	100	100	100	100	100	99.7	100	99.7	100	100	99.7	100	100	100	100	99.7	100	99.7	100	99.7	100	100	100	100	100	100	100
Didemnum_vexillum_EU419402.1	98.5	98.5	98.5	98.5	98.5	98.5	98.5	98.5	100	100	100	99.7	100	100	100	99.7	99.7	99.7	100	100	100	100	100	100	100	100	100	99.7	100	99.7	100	100	99.7	100	100	100	100	99.7	100	99.7	100	99.7	100	100	100	100	100	100	100
Didemnum_vexillum_JF738059.1 (H5 Clade A)	98.5	98.5	98.5	98.5	98.5	98.5	98.5	98.5	99.7	99.7	99.7	100	99.7	99.7	99.7	100	100	100	99.7	99.7	99.7	99.7	99.7	99.7	99.7	99.7	99.7	100	99.7	100	99.7	99.7	100	99.7	99.7	99.7	99.7	100	99.7	100	99.7	100	99.7	99.7	99.7	99.7	99.7	99.7	99.7
Didemnum_vexillum_EU419431.1	98.5	98.5	98.5	98.5	98.5	98.5	98.5	98.5	100	100	100	99.7	100	100	100	99.7	99.7	99.7	100	100	100	100	100	100	100	100	100	99.7	100	99.7	100	100	99.7	100	100	100	100	99.7	100	99.7	100	99.7	100	100	100	100	100	100	100
Didemnum_vexillum_EU742666.1	98.5	98.5	98.5	98.5	98.5	98.5	98.5	98.5	99.7	99.7	99.7	100	99.7	99.7	99.7	100	100	100	99.7	99.7	99.7	99.7	99.7	99.7	99.7	99.7	99.7	100	99.7	100	99.7	99.7	100	99.7	99.7	99.7	99.7	100	99.7	100	99.7	100	99.7	99.7	99.7	99.7	99.7	99.7	99.7
Didemnum_vexillum_EU742667.1	98.5	98.5	98.5	98.5	98.5	98.5	98.5	98.5	100	100	100	99.7	100	100	100	99.7	99.7	99.7	100	100	100	100	100	100	100	100	100	99.7	100	99.7	100	100	99.7	100	100	100	100	99.7	100	99.7	100	99.7	100	100	100	100	100	100	100
Didemnum_vexillum_EU419433.2	98.5	98.5	98.5	98.5	98.5	98.5	98.5	98.5	100	100	100	99.7	100	100	100	99.7	99.7	99.7	100	100	100	100	100	100	100	100	100	99.7	100	99.7	100	100	99.7	100	100	100	100	99.7	100	99.7	100	99.7	100	100	100	100	100	100	100
Didemnum_vexillum_EU419450.1	98.5	98.5	98.5	98.5	98.5	98.5	98.5	98.5	99.7	99.7	99.7	100	99.7	99.7	99.7	100	100	100	99.7	99.7	99.7	99.7	99.7	99.7	99.7	99.7	99.7	100	99.7	100	99.7	99.7	100	99.7	99.7	99.7	99.7	100	99.7	100	99.7	100	99.7	99.7	99.7	99.7	99.7	99.7	99.7
Didemnum_vexillum_EU419454.1	98.5	98.5	98.5	98.5	98.5	98.5	98.5	98.5	100	100	100	99.7	100	100	100	99.7	99.7	99.7	100	100	100	100	100	100	100	100	100	99.7	100	99.7	100	100	99.7	100	100	100	100	99.7	100	99.7	100	99.7	100	100	100	100	100	100	100
Didemnum_vexillum_EU419442.1	98.5	98.5	98.5	98.5	98.5	98.5	98.5	98.5	100	100	100	99.7	100	100	100	99.7	99.7	99.7	100	100	100	100	100	100	100	100	100	99.7	100	99.7	100	100	99.7	100	100	100	100	99.7	100	99.7	100	99.7	100	100	100	100	100	100	100
Didemnum_vexillum_EU419418.1	98.5	98.5	98.5	98.5	98.5	98.5	98.5	98.5	100	100	100	99.7	100	100	100	99.7	99.7	99.7	100	100	100	100	100	100	100	100	100	99.7	100	99.7	100	100	99.7	100	100	100	100	99.7	100	99.7	100	99.7	100	100	100	100	100	100	100
Didemnum_vexillum_EU419451.1	98.5	98.5	98.5	98.5	98.5	98.5	98.5	98.5	100	100	100	99.7	100	100	100	99.7	99.7	99.7	100	100	100	100	100	100	100	100	100	99.7	100	99.7	100	100	99.7	100	100	100	100	99.7	100	99.7	100	99.7	100	100	100	100	100	100	100
Didemnum_vexillum_EU419435.1	98.5	98.5	98.5	98.5	98.5	98.5	98.5	98.5	99.7	99.7	99.7	100	99.7	99.7	99.7	100	100	100	99.7	99.7	99.7	99.7	99.7	99.7	99.7	99.7	99.7	100	99.7	100	99.7	99.7	100	99.7	99.7	99.7	99.7	100	99.7	100	99.7	100	99.7	99.7	99.7	99.7	99.7	99.7	99.7
Didemnum_vexillum_EU419419.1	98.5	98.5	98.5	98.5	98.5	98.5	98.5	98.5	100	100	100	99.7	100	100	100	99.7	99.7	99.7	100	100	100	100	100	100	100	100	100	99.7	100	99.7	100	100	99.7	100	100	100	100	99.7	100	99.7	100	99.7	100	100	100	100	100	100	100
Didemnum_vexillum_EU742664.1 (H4 Clade A)	98.5	98.5	98.5	98.5	98.5	98.5	98.5	98.5	99.7	99.7	99.7	100	99.7	99.7	99.7	100	100	100	99.7	99.7	99.7	99.7	99.7	99.7	99.7	99.7	99.7	100	99.7	100	99.7	99.7	100	99.7	99.7	99.7	99.7	100	99.7	100	99.7	100	99.7	99.7	99.7	99.7	99.7	99.7	99.7
Didemnum_vexillum_EU419448.2	98.5	98.5	98.5	98.5	98.5	98.5	98.5	98.5	100	100	100	99.7	100	100	100	99.7	99.7	99.7	100	100	100	100	100	100	100	100	100	99.7	100	99.7	100	100	99.7	100	100	100	100	99.7	100	99.7	100	99.7	100	100	100	100	100	100	100
Didemnum_vexillum_EU419434.1	98.5	98.5	98.5	98.5	98.5	98.5	98.5	98.5	99.7	99.7	99.7	100	99.7	99.7	99.7	100	100	100	99.7	99.7	99.7	99.7	99.7	99.7	99.7	99.7	99.7	100	99.7	100	99.7	99.7	100	99.7	99.7	99.7	99.7	100	99.7	100	99.7	100	99.7	99.7	99.7	99.7	99.7	99.7	99.7
Didemnum_vexillum_EU419403.1	98.5	98.5	98.5	98.5	98.5	98.5	98.5	98.5	100	100	100	99.7	100	100	100	99.7	99.7	99.7	100	100	100	100	100	100	100	100	100	99.7	100	99.7	100	100	99.7	100	100	100	100	99.7	100	99.7	100	99.7	100	100	100	100	100	100	100
Didemnum_vexillum_EU419437.2	98.5	98.5	98.5	98.5	98.5	98.5	98.5	98.5	100	100	100	99.7	100	100	100	99.7	99.7	99.7	100	100	100	100	100	100	100	100	100	99.7	100	99.7	100	100	99.7	100	100	100	100	99.7	100	99.7	100	99.7	100	100	100	100	100	100	100
Didemnum_vexillum_EU742662.1	98.5	98.5	98.5	98.5	98.5	98.5	98.5	98.5	100	100	100	99.7	100	100	100	99.7	99.7	99.7	100	100	100	100	100	100	100	100	100	99.7	100	99.7	100	100	99.7	100	100	100	100	99.7	100	99.7	100	99.7	100	100	100	100	100	100	100
Didemnum_vexillum_EU419415.1	98.5	98.5	98.5	98.5	98.5	98.5	98.5	98.5	100	100	100	99.7	100	100	100	99.7	99.7	99.7	100	100	100	100	100	100	100	100	100	99.7	100	99.7	100	100	99.7	100	100	100	100	99.7	100	99.7	100	99.7	100	100	100	100	100	100	100
Didemnum_vexillum_EU419410.1	98.5	98.5	98.5	98.5	98.5	98.5	98.5	98.5	100	100	100	99.7	100	100	100	99.7	99.7	99.7	100	100	100	100	100	100	100	100	100	99.7	100	99.7	100	100	99.7	100	100	100	100	99.7	100	99.7	100	99.7	100	100	100	100	100	100	100
Didemnum_vexillum_EU419404.2	98.5	98.5	98.5	98.5	98.5	98.5	98.5	98.5	100	100	100	99.7	100	100	100	99.7	99.7	99.7	100	100	100	100	100	100	100	100	100	99.7	100	99.7	100	100	99.7	100	100	100	100	99.7	100	99.7	100	99.7	100	100	100	100	100	100	100
Didemnum_vexillum_EU742677.1	98.5	98.5	98.5	98.5	98.5	98.5	98.5	98.5	100	100	100	99.7	100	100	100	99.7	99.7	99.7	100	100	100	100	100	100	100	100	100	99.7	100	99.7	100	100	99.7	100	100	100	100	99.7	100	99.7	100	99.7	100	100	100	100	100	100	100
Didemnum_vexillum_EU419430.1	98.5	98.5	98.5	98.5	98.5	98.5	98.5	98.5	100	100	100	99.7	100	100	100	99.7	99.7	99.7	100	100	100	100	100	100	100	100	100	99.7	100	99.7	100	100	99.7	100	100	100	100	99.7	100	99.7	100	99.7	100	100	100	100	100	100	100
Didemnum_vexillum_JF738058.1 (H7 Clade A)	98.5	98.5	98.5	98.5	98.5	98.5	98.5	98.5	100	100	100	99.7	100	100	100	99.7	99.7	99.7	100	100	100	100	100	100	100	100	100	99.7	100	99.7	100	100	99.7	100	100	100	100	99.7	100	99.7	100	99.7	100	100	100	100	100	100	100
Didemnum_vexillum_EU419455.1	98.5	98.5	98.5	98.5	98.5	98.5	98.5	98.5	100	100	100	99.7	100	100	100	99.7	99.7	99.7	100	100	100	100	100	100	100	100	100	99.7	100	99.7	100	100	99.7	100	100	100	100	99.7	100	99.7	100	99.7	100	100	100	100	100	100	100
Didemnum_vexillum_EU419406.2	98.5	98.5	98.5	98.5	98.5	98.5	98.5	98.5	99.7	99.7	99.7	100	99.7	99.7	99.7	100	100	100	99.7	99.7	99.7	99.7	99.7	99.7	99.7	99.7	99.7	100	99.7	100	99.7	99.7	100	99.7	99.7	99.7	99.7	100	99.7	100	99.7	100	99.7	99.7	99.7	99.7	99.7	99.7	99.7
Didemnum_vexillum_EU419440.2	98.5	98.5	98.5	98.5	98.5	98.5	98.5	98.5	100	100	100	99.7	100	100	100	99.7	99.7	99.7	100	100	100	100	100	100	100	100	100	99.7	100	99.7	100	100	99.7	100	100	100	100	99.7	100	99.7	100	99.7	100	100	100	100	100	100	100
Didemnum_vexillum_EU419428.1	98.5	98.5	98.5	98.5	98.5	98.5	98.5	98.5	100	100	100	99.7	100	100	100	99.7	99.7	99.7	100	100	100	100	100	100	100	100	100	99.7	100	99.7	100	100	99.7	100	100	100	100	99.7	100	99.7	100	99.7	100	100	100	100	100	100	100
Didemnum_vexillum_EU419420.1	98.5	98.5	98.5	98.5	98.5	98.5	98.5	98.5	100	100	100	99.7	100	100	100	99.7	99.7	99.7	100	100	100	100	100	100	100	100	100	99.7	100	99.7	100	100	99.7	100	100	100	100	99.7	100	99.7	100	99.7	100	100	100	100	100	100	100
Didemnum_vexillum_EU419405.1	98.5	98.5	98.5	98.5	98.5	98.5	98.5	98.5	100	100	100	99.7	100	100	100	99.7	99.7	99.7	100	100	100	100	100	100	100	100	100	99.7	100	99.7	100	100	99.7	100	100	100	100	99.7	100	99.7	100	99.7	100	100	100	100	100	100	100
Didemnum_vexillum_EU419429.1	98.5	98.5	98.5	98.5	98.5	98.5	98.5	98.5	99.7	99.7	99.7	100	99.7	99.7	99.7	100	100	100	99.7	99.7	99.7	99.7	99.7	99.7	99.7	99.7	99.7	100	99.7	100	99.7	99.7	100	99.7	99.7	99.7	99.7	100	99.7	100	99.7	100	99.7	99.7	99.7	99.7	99.7	99.7	99.7
Didemnum_vexillum_EU419443.1	98.5	98.5	98.5	98.5	98.5	98.5	98.5	98.5	100	100	100	99.7	100	100	100	99.7	99.7	99.7	100	100	100	100	100	100	100	100	100	99.7	100	99.7	100	100	99.7	100	100	100	100	99.7	100	99.7	100	99.7	100	100	100	100	100	100	100
Didemnum_vexillum_EU419424.1	98.5	98.5	98.5	98.5	98.5	98.5	98.5	98.5	99.7	99.7	99.7	100	99.7	99.7	99.7	100	100	100	99.7	99.7	99.7	99.7	99.7	99.7	99.7	99.7	99.7	100	99.7	100	99.7	99.7	100	99.7	99.7	99.7	99.7	100	99.7	100	99.7	100	99.7	99.7	99.7	99.7	99.7	99.7	99.7
Didemnum_vexillum_EU419444.1	98.5	98.5	98.5	98.5	98.5	98.5	98.5	98.5	100	100	100	99.7	100	100	100	99.7	99.7	99.7	100	100	100	100	100	100	100	100	100	99.7	100	99.7	100	100	99.7	100	100	100	100	99.7	100	99.7	100	99.7	100	100	100	100	100	100	100
Didemnum_vexillum_EU742675.2	98.5	98.5	98.5	98.5	98.5	98.5	98.5	98.5	100	100	100	99.7	100	100	100	99.7	99.7	99.7	100	100	100	100	100	100	100	100	100	99.7	100	99.7	100	100	99.7	100	100	100	100	99.7	100	99.7	100	99.7	100	100	100	100	100	100	100
Didemnum_vexillum_EU419414.1	98.5	98.5	98.5	98.5	98.5	98.5	98.5	98.5	100	100	100	99.7	100	100	100	99.7	99.7	99.7	100	100	100	100	100	100	100	100	100	99.7	100	99.7	100	100	99.7	100	100	100	100	99.7	100	99.7	100	99.7	100	100	100	100	100	100	100
Didemnum_vexillum_EU419409.1	98.5	98.5	98.5	98.5	98.5	98.5	98.5	98.5	100	100	100	99.7	100	100	100	99.7	99.7	99.7	100	100	100	100	100	100	100	100	100	99.7	100	99.7	100	100	99.7	100	100	100	100	99.7	100	99.7	100	99.7	100	100	100	100	100	100	100
Didemnum_vexillum_EU419416.1	98.5	98.5	98.5	98.5	98.5	98.5	98.5	98.5	100	100	100	99.7	100	100	100	99.7	99.7	99.7	100	100	100	100	100	100	100	100	100	99.7	100	99.7	100	100	99.7	100	100	100	100	99.7	100	99.7	100	99.7	100	100	100	100	100	100	100
Didemnum_vexillum_EU419438.2	98.5	98.5	98.5	98.5	98.5	98.5	98.5	98.5	100	100	100	99.7	100	100	100	99.7	99.7	99.7	100	100	100	100	100	100	100	100	100	99.7	100	99.7	100	100	99.7	100	100	100	100	99.7	100	99.7	100	99.7	100	100	100	100	100	100	100
Didemnum_vexillum_EU419422.1	98.5	98.5	98.5	98.5	98.5	98.5	98.5	98.5	99.7	99.7	99.7	100	99.7	99.7	99.7	100	100	100	99.7	99.7	99.7	99.7	99.7	99.7	99.7	99.7	99.7	100	99.7	100	99.7	99.7	100	99.7	99.7	99.7	99.7	100	99.7	100	99.7	100	99.7	99.7	99.7	99.7	99.7	99.7	99.7
Didemnum_vexillum_EU419446.1	98.5	98.5	98.5	98.5	98.5	98.5	98.5	98.5	100	100	100	99.7	100	100	100	99.7	99.7	99.7	100	100	100	100	100	100	100	100	100	99.7	100	99.7	100	100	99.7	100	100	100	100	99.7	100	99.7	100	99.7	100	100	100	100	100	100	100
Didemnum_vexillum_JF738060.1 (H6 Clade A)	98.5	98.5	98.5	98.5	98.5	98.5	98.5	98.5	99.7	99.7	99.7	100	99.7	99.7	99.7	100	100	100	99.7	99.7	99.7	99.7	99.7	99.7	99.7	99.7	99.7	100	99.7	100	99.7	99.7	100	99.7	99.7	99.7	99.7	100	99.7	100	99.7	100	99.7	99.7	99.7	99.7	99.7	99.7	99.7
Didemnum_vexillum_EU419459.1 (H8 Clade A)	98.2	98.2	98.2	98.2	98.2	98.2	98.2	98.2	99.4	99.4	99.4	99.7	99.4	99.4	99.4	99.7	99.7	99.7	99.4	99.4	99.4	99.4	99.4	99.4	99.4	99.4	99.4	99.7	99.4	99.7	99.4	99.4	99.7	99.4	99.4	99.4	99.4	99.7	99.4	99.7	99.4	99.7	99.4	99.4	99.4	99.4	99.4	99.4	99.4
Didemnum_vexillum_JQ663511.1	98.2	98.2	98.2	98.2	98.2	98.2	98.2	98.2	99.4	99.4	99.4	99.7	99.4	99.4	99.4	99.7	99.7	99.7	99.4	99.4	99.4	99.4	99.4	99.4	99.4	99.4	99.4	99.7	99.4	99.7	99.4	99.4	99.7	99.4	99.4	99.4	99.4	99.7	99.4	99.7	99.4	99.7	99.4	99.4	99.4	99.4	99.4	99.4	99.4
Didemnum_vexillum_JQ663510.1	98.2	98.2	98.2	98.2	98.2	98.2	98.2	98.2	99.4	99.4	99.4	99.7	99.4	99.4	99.4	99.7	99.7	99.7	99.4	99.4	99.4	99.4	99.4	99.4	99.4	99.4	99.4	99.7	99.4	99.7	99.4	99.4	99.7	99.4	99.4	99.4	99.4	99.7	99.4	99.7	99.4	99.7	99.4	99.4	99.4	99.4	99.4	99.4	99.4
Didemnum_vexillum_JQ663516.1	98.2	98.2	98.2	98.2	98.2	98.2	98.2	98.2	99.4	99.4	99.4	99.7	99.4	99.4	99.4	99.7	99.7	99.7	99.4	99.4	99.4	99.4	99.4	99.4	99.4	99.4	99.4	99.7	99.4	99.7	99.4	99.4	99.7	99.4	99.4	99.4	99.4	99.7	99.4	99.7	99.4	99.7	99.4	99.4	99.4	99.4	99.4	99.4	99.4
Didemnum_vexillum_EU419458.2	98.2	98.2	98.2	98.2	98.2	98.2	98.2	98.2	99.4	99.4	99.4	99.7	99.4	99.4	99.4	99.7	99.7	99.7	99.4	99.4	99.4	99.4	99.4	99.4	99.4	99.4	99.4	99.7	99.4	99.7	99.4	99.4	99.7	99.4	99.4	99.4	99.4	99.7	99.4	99.7	99.4	99.7	99.4	99.4	99.4	99.4	99.4	99.4	99.4
Didemnum_granulatum_JQ013198.1	96.7	96.7	96.7	96.7	96.7	96.7	96.7	96.7	98.2	98.2	98.2	97.9	98.2	98.2	98.2	97.9	97.9	97.9	98.2	98.2	98.2	98.2	98.2	98.2	98.2	98.2	98.2	97.9	98.2	97.9	98.2	98.2	97.9	98.2	98.2	98.2	98.2	97.9	98.2	97.9	98.2	97.9	98.2	98.2	98.2	98.2	98.2	98.2	98.2
Didemnum_vexillum_JQ663513.1	95.5	95.5	95.5	95.5	95.5	95.5	95.5	95.5	95.8	95.8	95.8	95.5	95.8	95.8	95.8	95.5	95.5	95.5	95.8	95.8	95.8	95.8	95.8	95.8	95.8	95.8	95.8	95.5	95.8	95.5	95.8	95.8	95.5	95.8	95.8	95.8	95.8	95.5	95.8	95.5	95.8	95.5	95.8	95.8	95.8	95.8	95.8	95.8	95.8
Didemnum_vexillum_JF738064.1 (H12 Clade B)	95.5	95.5	95.5	95.5	95.5	95.5	95.5	95.5	95.8	95.8	95.8	95.5	95.8	95.8	95.8	95.5	95.5	95.5	95.8	95.8	95.8	95.8	95.8	95.8	95.8	95.8	95.8	95.5	95.8	95.5	95.8	95.8	95.5	95.8	95.8	95.8	95.8	95.5	95.8	95.5	95.8	95.5	95.8	95.8	95.8	95.8	95.8	95.8	95.8
Didemnum_vexillum_JQ663514.1	95.5	95.5	95.5	95.5	95.5	95.5	95.5	95.5	95.8	95.8	95.8	95.5	95.8	95.8	95.8	95.5	95.5	95.5	95.8	95.8	95.8	95.8	95.8	95.8	95.8	95.8	95.8	95.5	95.8	95.5	95.8	95.8	95.5	95.8	95.8	95.8	95.8	95.5	95.8	95.5	95.8	95.5	95.8	95.8	95.8	95.8	95.8	95.8	95.8
Didemnum_vexillum_JQ663515.1	95.8	95.8	95.8	95.8	95.8	95.8	95.8	95.8	96.1	96.1	96.1	95.8	96.1	96.1	96.1	95.8	95.8	95.8	96.1	96.1	96.1	96.1	96.1	96.1	96.1	96.1	96.1	95.8	96.1	95.8	96.1	96.1	95.8	96.1	96.1	96.1	96.1	95.8	96.1	95.8	96.1	95.8	96.1	96.1	96.1	96.1	96.1	96.1	96.1
Didemnum_vexillum_JF738066.1 (H14 Clade B)	95.5	95.5	95.5	95.5	95.5	95.5	95.5	95.5	95.8	95.8	95.8	95.5	95.8	95.8	95.8	95.5	95.5	95.5	95.8	95.8	95.8	95.8	95.8	95.8	95.8	95.8	95.8	95.5	95.8	95.5	95.8	95.8	95.5	95.8	95.8	95.8	95.8	95.5	95.8	95.5	95.8	95.5	95.8	95.8	95.8	95.8	95.8	95.8	95.8
Didemnum_vexillum_EU742669.1	95.8	95.8	95.8	95.8	95.8	95.8	95.8	95.8	96.1	96.1	96.1	95.8	96.1	96.1	96.1	95.8	95.8	95.8	96.1	96.1	96.1	96.1	96.1	96.1	96.1	96.1	96.1	95.8	96.1	95.8	96.1	96.1	95.8	96.1	96.1	96.1	96.1	95.8	96.1	95.8	96.1	95.8	96.1	96.1	96.1	96.1	96.1	96.1	96.1
Didemnum_vexillum_JQ663512.1	95.8	95.8	95.8	95.8	95.8	95.8	95.8	95.8	96.1	96.1	96.1	95.8	96.1	96.1	96.1	95.8	95.8	95.8	96.1	96.1	96.1	96.1	96.1	96.1	96.1	96.1	96.1	95.8	96.1	95.8	96.1	96.1	95.8	96.1	96.1	96.1	96.1	95.8	96.1	95.8	96.1	95.8	96.1	96.1	96.1	96.1	96.1	96.1	96.1
Didemnum_vexillum_JF738063.1 (H11 Clade B)	95.8	95.8	95.8	95.8	95.8	95.8	95.8	95.8	96.1	96.1	96.1	95.8	96.1	96.1	96.1	95.8	95.8	95.8	96.1	96.1	96.1	96.1	96.1	96.1	96.1	96.1	96.1	95.8	96.1	95.8	96.1	96.1	95.8	96.1	96.1	96.1	96.1	95.8	96.1	95.8	96.1	95.8	96.1	96.1	96.1	96.1	96.1	96.1	96.1
Didemnum_vexillum_JF738068.1 (H16 Clade B)	95.8	95.8	95.8	95.8	95.8	95.8	95.8	95.8	96.1	96.1	96.1	95.8	96.1	96.1	96.1	95.8	95.8	95.8	96.1	96.1	96.1	96.1	96.1	96.1	96.1	96.1	96.1	95.8	96.1	95.8	96.1	96.1	95.8	96.1	96.1	96.1	96.1	95.8	96.1	95.8	96.1	95.8	96.1	96.1	96.1	96.1	96.1	96.1	96.1
Didemnum_vexillum_JF738067.1 (H15 Clade B)	95.2	95.2	95.2	95.2	95.2	95.2	95.2	95.2	95.5	95.5	95.5	95.2	95.5	95.5	95.5	95.2	95.2	95.2	95.5	95.5	95.5	95.5	95.5	95.5	95.5	95.5	95.5	95.2	95.5	95.2	95.5	95.5	95.2	95.5	95.5	95.5	95.5	95.2	95.5	95.2	95.5	95.2	95.5	95.5	95.5	95.5	95.5	95.5	95.5
Didemnum_vexillum_JF738062.1 (H10 Clade B)	95.8	95.8	95.8	95.8	95.8	95.8	95.8	95.8	96.1	96.1	96.1	95.8	96.1	96.1	96.1	95.8	95.8	95.8	96.1	96.1	96.1	96.1	96.1	96.1	96.1	96.1	96.1	95.8	96.1	95.8	96.1	96.1	95.8	96.1	96.1	96.1	96.1	95.8	96.1	95.8	96.1	95.8	96.1	96.1	96.1	96.1	96.1	96.1	96.1
Didemnum_vexillum_EU742670.1	95.5	95.5	95.5	95.5	95.5	95.5	95.5	95.5	95.8	95.8	95.8	95.5	95.8	95.8	95.8	95.5	95.5	95.5	95.8	95.8	95.8	95.8	95.8	95.8	95.8	95.8	95.8	95.5	95.8	95.5	95.8	95.8	95.5	95.8	95.8	95.8	95.8	95.5	95.8	95.5	95.8	95.5	95.8	95.8	95.8	95.8	95.8	95.8	95.8
Didemnum_vexillum_EU742672.1	95.5	95.5	95.5	95.5	95.5	95.5	95.5	95.5	95.8	95.8	95.8	95.5	95.8	95.8	95.8	95.5	95.5	95.5	95.8	95.8	95.8	95.8	95.8	95.8	95.8	95.8	95.8	95.5	95.8	95.5	95.8	95.8	95.5	95.8	95.8	95.8	95.8	95.5	95.8	95.5	95.8	95.5	95.8	95.8	95.8	95.8	95.8	95.8	95.8
Didemnum_vexillum_EU742673.1	95.5	95.5	95.5	95.5	95.5	95.5	95.5	95.5	95.8	95.8	95.8	95.5	95.8	95.8	95.8	95.5	95.5	95.5	95.8	95.8	95.8	95.8	95.8	95.8	95.8	95.8	95.8	95.5	95.8	95.5	95.8	95.8	95.5	95.8	95.8	95.8	95.8	95.5	95.8	95.5	95.8	95.5	95.8	95.8	95.8	95.8	95.8	95.8	95.8
Didemnum_vexillum_EU742671.1	95.5	95.5	95.5	95.5	95.5	95.5	95.5	95.5	95.8	95.8	95.8	95.5	95.8	95.8	95.8	95.5	95.5	95.5	95.8	95.8	95.8	95.8	95.8	95.8	95.8	95.8	95.8	95.5	95.8	95.5	95.8	95.8	95.5	95.8	95.8	95.8	95.8	95.5	95.8	95.5	95.8	95.5	95.8	95.8	95.8	95.8	95.8	95.8	95.8
Didemnum_vexillum_EU742668.1	95.5	95.5	95.5	95.5	95.5	95.5	95.5	95.5	95.8	95.8	95.8	95.5	95.8	95.8	95.8	95.5	95.5	95.5	95.8	95.8	95.8	95.8	95.8	95.8	95.8	95.8	95.8	95.5	95.8	95.5	95.8	95.8	95.5	95.8	95.8	95.8	95.8	95.5	95.8	95.5	95.8	95.5	95.8	95.8	95.8	95.8	95.8	95.8	95.8
Didemnum_vexillum_JF738061.1 (H9 Clade B)	95.5	95.5	95.5	95.5	95.5	95.5	95.5	95.5	95.8	95.8	95.8	95.5	95.8	95.8	95.8	95.5	95.5	95.5	95.8	95.8	95.8	95.8	95.8	95.8	95.8	95.8	95.8	95.5	95.8	95.5	95.8	95.8	95.5	95.8	95.8	95.8	95.8	95.5	95.8	95.5	95.8	95.5	95.8	95.8	95.8	95.8	95.8	95.8	95.8
Didemnum_vexillum_JF738065.1 (H13 Clade B)	95.2	95.2	95.2	95.2	95.2	95.2	95.2	95.2	95.5	95.5	95.5	95.2	95.5	95.5	95.5	95.2	95.2	95.2	95.5	95.5	95.5	95.5	95.5	95.5	95.5	95.5	95.5	95.2	95.5	95.2	95.5	95.5	95.2	95.5	95.5	95.5	95.5	95.2	95.5	95.2	95.5	95.2	95.5	95.5	95.5	95.5	95.5	95.5	95.5
Didemnum_vexillum_JF738069.1 (H17 Clade B)	95.8	95.8	95.8	95.8	95.8	95.8	95.8	95.8	96.1	96.1	96.1	95.8	96.1	96.1	96.1	95.8	95.8	95.8	96.1	96.1	96.1	96.1	96.1	96.1	96.1	96.1	96.1	95.8	96.1	95.8	96.1	96.1	95.8	96.1	96.1	96.1	96.1	95.8	96.1	95.8	96.1	95.8	96.1	96.1	96.1	96.1	96.1	96.1	96.1
Didemnum_vexillum_JQ663517.1	93.7	93.7	93.7	93.7	93.7	93.7	93.7	93.7	94	94	94	93.7	94	94	94	93.7	93.7	93.7	94	94	94	94	94	94	94	94	94	93.7	94	93.7	94	94	93.7	94	94	94	94	93.7	94	93.7	94	93.7	94	94	94	94	94	94	94
[truncated: 46 more columns]
